# Supplementary material for: Prevention of Taste Alterations in Patients with Cancer Receiving Paclitaxel- or Oxaliplatin-Based Chemotherapy—A Pilot Trial of Cannabidiol
Source: MDPI journal article supplement (doi:10.3390/nu15133014), 2023-07-01
Supplement: s1 [file s1]

**Table S1.** Data from sensory test from patients in the control group. Patients indicated on a VAS-scale how intense the taste was perceived. Samples were randomised at testing.

| Patient ID | Chemotherapy cycle nr. | Salt |        | Sweet |        | Umami |        |
|------------|------------------------|------|--------|-------|--------|-------|--------|
|            |                        | Weak | Strong | Weak  | Strong | Weak  | Strong |
| Control-1  | 1                      | 35   | 10     | 01    | 03     | 01    | 01     |
| Control-1  | 2                      | 100  | 94     | 12    | 30     | 01    | 02     |
| Control-1  | 3                      | 48   | 95     | 01    | 01     | 04    | 03     |
| Control-1  | 4                      | 13   | 00     | 01    | 01     | 78    | 20     |
| Control-2  | 1                      | 08   | 86     | 84    | 71     | 00    | 91     |
| Control-2  | 2                      | 94   | 95     | 89    | 99     | 00    | 97     |
| Control-2  | 3                      | 60   | 100    | 24    | 100    | 100   | 0      |
| Control-2  | 4                      | 23   | 81     | 14    | 85     | 00    | 90     |
| Control-3  | 1                      | 38   | 73     | 20    | 69     | 28    | 45     |
| Control-3  | 2                      | 32   | 86     | 72    | 99     | 82    | 45     |
| Control-3  | 3                      | 67   | 56     | 90    | 92     | 75    | 52     |
| Control-3  | 4                      | 54   | 55     | 70    | 91     | 62    | 76     |
| Control-4  | 1                      | 56   | 52     | 05    | 36     | 13    | 07     |
| Control-4  | 2                      | 79   | 92     | 50    | 08     | 60    | 82     |
| Control-4  | 3                      | 94   | 91     | 54    | 94     | 52    | 54     |
| Control-4  | 4                      | NA   | NA     | NA    | NA     | NA    | NA     |
| Control-5  | 1                      | 46   | 81     | 44    | 53     | 01    | 04     |
| Control-5  | 2                      | 53   | 96     | 92    | 96     | 00    | 59     |
| Control-5  | 3                      | 95   | 98     | 44    | 74     | 51    | 93     |
| Control-5  | 4                      | 94   | 41     | 94    | 96     | 49    | 98     |
| Control-6  | 1                      | 88   | 54     | 27    | 99     | 00    | 00     |
| Control-6  | 2                      | 51   | 84     | 04    | 52     | 16    | 31     |
| Control-6  | 3                      | 55   | 49     | 13    | 21     | 22    | 06     |
| Control-6  | 4                      | 22   | 65     | 07    | 14     | 06    | 08     |
| Control-7  | 1                      | 59   | 62     | 00    | 49     | 44    | 67     |
| Control-7  | 2                      | 54   | 60     | 00    | 49     | 49    | 34     |
| Control-7  | 3                      | 00   | 60     | 54    | 73     | 00    | 56     |
| Control-7  | 4                      | 20   | 80     | 49    | 71     | 92    | 84     |
| Control-8  | 1                      | 53   | 98     | 11    | 94     | 04    | 91     |
| Control-8  | 2                      | 86   | 72     | 18    | 20     | 28    | 17     |
| Control-8  | 3                      | 65   | 94     | 11    | 96     | 83    | 05     |
| Control-8  | 4                      | 07   | 90     | 12    | 92     | 18    | 80     |
| Control-9  | 1                      | 83   | 96     | 23    | 92     | 34    | 46     |
| Control-9  | 2                      | 52   | 81     | 01    | 90     | 33    | 53     |
| Control-9  | 3                      | 47   | 00     | 12    | 83     | 22    | 46     |
| Control-9  | 4                      | 46   | 94     | 44    | 71     | 34    | 45     |
| Control-10 | 1                      | 22   | 58     | 23    | 42     | 21    | 52     |
| Control-10 | 2                      | 77   | 49     | 50    | 49     | 36    | 24     |
| Control-10 | 3                      | 37   | 80     | 31    | 65     | 51    | 48     |
| Control-10 | 4                      | 58   | 42     | 23    | 23     | 21    | 59     |

**Table S2.** Data from sensory test from patient 1-10 in the intervention group. Patients indicated on a VAS-scale how intense the taste was perceived. Samples were randomised at testing.

| Patient ID      | Chemotherapy cycle nr. | Salt |        | Sweet |        | Umami |        |
|-----------------|------------------------|------|--------|-------|--------|-------|--------|
|                 |                        | Weak | Strong | Weak  | Strong | Weak  | Strong |
| Intervention-1  | 1                      | 40   | 69     | 49    | 44     | 26    | 06     |
| Intervention-1  | 2                      | 63   | 72     | 11    | 35     | 02    | 12     |
| Intervention-1  | 3                      | NA   | NA     | NA    | NA     | NA    | NA     |
| Intervention-1  | 4                      | NA   | NA     | NA    | NA     | NA    | NA     |
| Intervention-2  | 1                      | 80   | 54     | NA    | 28     | 11    | 15     |
| Intervention-2  | 2                      | 20   | NA     | NA    | 41     | NA    | 55     |
| Intervention-2  | 3                      | 51   | 69     | 72    | 12     | NA    | 49     |
| Intervention-2  | 4                      | 52   | 69     | 21    | 42     | 48    | 14     |
| Intervention-3  | 1                      | 55   | 77     | 34    | 75     | 18    | 49     |
| Intervention-3  | 2                      | 82   | 15     | 10    | 75     | 15    | 29     |
| Intervention-3  | 3                      | NA   | NA     | NA    | NA     | NA    | NA     |
| Intervention-3  | 4                      | 54   | 72     | 35    | 25     | 30    | 27     |
| Intervention-4  | 1                      | 39   | 88     | 25    | 98     | 66    | 52     |
| Intervention-4  | 2                      | 35   | 50     | 00    | 87     | 85    | 86     |
| Intervention-4  | 3                      | NA   | NA     | NA    | NA     | NA    | NA     |
| Intervention-4  | 4                      | NA   | NA     | NA    | NA     | NA    | NA     |
| Intervention-5  | 1                      | 45   | 15     | 22    | 28     | 00    | 02     |
| Intervention-5  | 2                      | 34   | 18     | 25    | 26     | 25    | 33     |
| Intervention-5  | 3                      | 39   | 64     | 59    | 30     | 50    | 47     |
| Intervention-5  | 4                      | 55   | 41     | 60    | 71     | 60    | 49     |
| Intervention-6  | 1                      | 70   | 83     | 07    | 84     | 44    | 73     |
| Intervention-6  | 2                      | NA   | NA     | NA    | NA     | NA    | NA     |
| Intervention-6  | 3                      | 59   | 89     | 05    | 14     | 28    | 67     |
| Intervention-6  | 4                      | NA   | NA     | NA    | NA     | NA    | NA     |
| Intervention-7  | 1                      | 67   | 78     | 81    | 58     | 48    | 55     |
| Intervention-7  | 2                      | 95   | 72     | 58    | 54     | 64    | 54     |
| Intervention-7  | 3                      | 75   | 70     | 65    | 65     | 64    | 56     |
| Intervention-7  | 4                      | 84   | 85     | 52    | 67     | 49    | 55     |
| Intervention-8  | 1                      | NA   | 71     | 49    | 96     | NA    | NA     |
| Intervention-8  | 2                      | 45   | 55     | NA    | 50     | NA    | 50     |
| Intervention-8  | 3                      | 48   | 59     | 48    | 46     | 08    | 50     |
| Intervention-8  | 4                      | 69   | 75     | 41    | 11     | 65    | 00     |
| Intervention-9  | 1                      | 52   | 76     | 10    | 59     | 68    | 19     |
| Intervention-9  | 2                      | 84   | 83     | 54    | 18     | NA    | 100    |
| Intervention-9  | 3                      | 95   | 100    | 86    | 98     | 68    | 61     |
| Intervention-9  | 4                      | 97   | 99     | NA    | 85     | 72    | 49     |
| Intervention-10 | 1                      | 25   | 82     | 58    | 22     | 53    | 91     |
| Intervention-10 | 2                      | 49   | 67     | 05    | 94     | 04    | 85     |
| Intervention-10 | 3                      | 42   | 95     | 05    | 97     | 17    | 35     |
| Intervention-10 | 4                      | 78   | 82     | 03    | 83     | 29    | 33     |

**Table S3.** Data from sensory test from patient 11-20 in the intervention group. Patients indicated on a VAS-scale how intense the taste was perceived. Samples were randomised at testing.

| Patient ID      | Chemotherapy cycle nr. | Salt |        | Sweet |        | Umami |        |
|-----------------|------------------------|------|--------|-------|--------|-------|--------|
|                 |                        | Weak | Strong | Weak  | Strong | Weak  | Strong |
| Intervention-11 | 1                      | 34   | 78     | 00    | 70     | 43    | 55     |
| Intervention-11 | 2                      | 35   | 53     | 42    | 60     | NA    | 56     |
| Intervention-11 | 3                      | 45   | 75     | 06    | 71     | 00    | 00     |
| Intervention-11 | 4                      | NA   | NA     | NA    | NA     | NA    | NA     |
| Intervention-12 | 1                      | 00   | 52     | 83    | 52     | 89    | 00     |
| Intervention-12 | 2                      | 92   | 98     | 57    | 52     | 13    | 03     |
| Intervention-12 | 3                      | 05   | 06     | 50    | 95     | 00    | 23     |
| Intervention-12 | 4                      | NA   | 91     | NA    | 55     | 48    | 56     |
| Intervention-13 | 1                      | 42   | 94     | 62    | 52     | 45    | 37     |
| Intervention-13 | 2                      | 62   | 67     | 50    | 79     | 29    | 21     |
| Intervention-13 | 3                      | 65   | 72     | 34    | 81     | 33    | 59     |
| Intervention-13 | 4                      | 44   | 56     | 31    | 74     | 23    | 68     |
| Intervention-14 | 1                      | 85   | 87     | 53    | 60     | 26    | 30     |
| Intervention-14 | 2                      | 56   | 86     | 55    | 59     | 61    | 19     |
| Intervention-14 | 3                      | 75   | 87     | 73    | 70     | 70    | 88     |
| Intervention-14 | 4                      | 39   | 79     | 68    | 60     | 20    | 36     |
| Intervention-15 | 1                      | 35   | 72     | 91    | 29     | 01    | 00     |
| Intervention-15 | 2                      | 04   | 01     | 87    | 35     | 01    | 04     |
| Intervention-15 | 3                      | 81   | 90     | 02    | 61     | 01    | 09     |
| Intervention-15 | 4                      | 09   | 85     | 01    | 85     | 01    | 44     |
| Intervention-16 | 1                      | 04   | 03     | 64    | 76     | 56    | 50     |
| Intervention-16 | 2                      | NA   | NA     | NA    | NA     | NA    | NA     |
| Intervention-16 | 3                      | NA   | NA     | NA    | NA     | NA    | NA     |
| Intervention-16 | 4                      | NA   | 67     | 03    | 42     | NA    | NA     |
| Intervention-17 | 1                      | 59   | 75     | 01    | 87     | 00    | 00     |
| Intervention-17 | 2                      | 91   | 76     | 06    | 92     | 19    | 49     |
| Intervention-17 | 3                      | NA   | NA     | NA    | NA     | NA    | NA     |
| Intervention-17 | 4                      | NA   | NA     | NA    | NA     | NA    | NA     |
| Intervention-18 | 1                      | 10   | 47     | 11    | 61     | 00    | 00     |
| Intervention-18 | 2                      | 05   | 11     | NA    | 15     | NA    | 12     |
| Intervention-18 | 3                      | NA   | NA     | NA    | NA     | NA    | NA     |
| Intervention-18 | 4                      | 15   | 58     | 00    | 23     | NA    | 19     |
| Intervention-19 | 1                      | 73   | 95     | 21    | 90     | 08    | 50     |
| Intervention-19 | 2                      | 95   | 01     | 96    | 96     | 56    | 03     |
| Intervention-19 | 3                      | 33   | 93     | 32    | 95     | 48    | 64     |
| Intervention-19 | 4                      | 96   | 57     | 90    | 95     | 69    | 29     |
| Intervention-20 | 1                      | 77   | 20     | 60    | 14     | 24    | 12     |
| Intervention-20 | 2                      | 48   | 25     | 04    | 51     | 27    | 09     |
| Intervention-20 | 3                      | 22   | 86     | 55    | 76     | 22    | 21     |
| Intervention-20 | 4                      | NA   | NA     | NA    | NA     | NA    | NA     |

**Table S4.** Data from sensory test from patient 21-22 in the intervention group. Patients indicated on a VAS-scale how intense the taste was perceived. Samples were randomised at testing.

|                 |   |     |    |    |    |    |    |
|-----------------|---|-----|----|----|----|----|----|
| Intervention-21 | 1 | 71  | 94 | 61 | 85 | 58 | 75 |
| Intervention-21 | 2 | 75  | 83 | 56 | 78 | 28 | 62 |
| Intervention-21 | 3 | NA  | NA | NA | NA | NA | NA |
| Intervention-21 | 4 | 59  | 81 | 79 | 61 | 60 | 58 |
| Intervention-22 | 1 | 100 | 96 | 53 | 95 | 04 | 54 |
| Intervention-22 | 2 | 97  | 85 | 01 | 70 | 48 | 62 |
| Intervention-22 | 3 | 67  | 22 | 01 | 25 | 01 | 61 |
| Intervention-22 | 4 | 36  | 70 | 50 | 39 | 52 | 00 |

The control group has 2.4% missing answers distributed equally between salt, sweet and umami. The intervention group has 21% missing answers distributed with 6.44% missing on salt, 6.82% missing on sweet and 7.77% missing on umami.
